# Supplementary material for: Combination of spatial transcriptomics analysis and retrospective study reveals liver infection of SARS-COV-2 is associated with clinical outcomes of COVID-19
Source: PubMed Central journal article supplement — eBioMedicine. 2024 Dec 21;111:105517. doi: 10.1016/j.ebiom.2024.105517 (PMC11732063; doi:10.1016/j.ebiom.2024.105517), 2024-12-21
Supplement: mmc2.pdf [file mmc2.pdf]

**Supplementary Table S1: Clinical information of COVID-19 patients used for spatial transcription analysis**

| <b>Subject.ID</b> | <b>Severity</b> | <b>Sex</b> | <b>Age</b> | <b>TP(g/l)</b> | <b>ALB(g/l)</b> | <b>GLB(g/l)</b> | <b>TB(<math>\mu</math>mol/L)</b> | <b>ALT(u/l)</b> | <b>AST(u/l)</b> | <b>ALP(u/l)</b> | <b>GGT(U/l)</b> | <b>LDH(U/L)</b> | <b>Respiratory RNA testing</b> | <b>Spatial Transcriptomics</b> |
|-------------------|-----------------|------------|------------|----------------|-----------------|-----------------|----------------------------------|-----------------|-----------------|-----------------|-----------------|-----------------|--------------------------------|--------------------------------|
| 1                 | Deceased        | Male       | 65         | 61             | 30              | 25              | 12.1                             | 15              | 14              | 73              | 34              | 408             | Positive>60 days               | Yes                            |
| 2                 | Deceased        | Female     | 78         | 60.81          | 27.68           | 33.13           | 24.9                             | 14              | 5               | 60              | 35              | 385             | Positive>60 days               | No                             |
| 3                 | Deceased        | Male       | 64         | 56             | 28              | 28              | 13.2                             | 30              | 25              | 118             | 63              | 333             | Positive>60 days               | No                             |
| 4                 | Severe          | Male       | 51         | 52             | 31              | 21              | 64.5                             | 50              | 91              | 1253            | 439             | 224             | Positive for 31 days           | Yes (on day 26)                |
| 5                 | Moderate        | Female     | 58         | 73             | 44.8            | 28.2            | 13.9                             | 33              | 44              | 115             | 128             | 234             | Positive <14 days              | Yes                            |
| 6                 | Moderate        | Male       | 56         | 78             | 34              | 44              | 26.5                             | 330             | 114             | 91              | 116             | 162             | Positive <14 days              | No                             |
