# Supplementary material for: Combination of spatial transcriptomics analysis and retrospective study reveals liver infection of SARS-COV-2 is associated with clinical outcomes of COVID-19
Source: PubMed Central journal article supplement — eBioMedicine. 2024 Dec 21;111:105517. doi: 10.1016/j.ebiom.2024.105517 (PMC11732063; doi:10.1016/j.ebiom.2024.105517), 2024-12-21
Supplement: mmc4.pdf [file mmc4.pdf]

**Supplementary Table S3: Top TCR CDR3 $\alpha$  clones in patients' livers**

| <b>Clone.ID</b> | <b>Clone.<br/>Fraction</b> | <b>V. Segment</b> | <b>J. Segment</b> | <b>CDR3.AA.Sequence</b> |
|-----------------|----------------------------|-------------------|-------------------|-------------------------|
| Deceased_1      | 0.053360                   | TRAV8-3           | TRAJ40            | CAVGFSGTYKYIF           |
| Deceased_2      | 0.045323                   | TRAV27            | TRAJ43            | CAGLTYNNDMRF            |
| Deceased_3      | 0.032820                   | TRAV12-2          | TRAJ52            | CAVMHAGGTSYGKLT         |
| Deceased_4      | 0.028801                   | TRAV8-4           | TRAJ43            | CAVSDQAGGNNDMRF         |
| Deceased_5      | 0.021210                   | TRAV38-<br>2DV8   | TRAJ18            | CASNGGSTLGRLYF          |
| Deceased_6      | 0.011163                   | TRAV3             | TRAJ13            | CAVRGLGSGGYQKVTS        |
| Severe_1        | 0.091133                   | TRAV12-1          | TRAJ50            | CVVTKTSYDKVIF           |
| Severe_2        | 0.091133                   | TRAV9-2           | TRAJ49            | CALSEGNTGNQFYF          |
| Severe_3        | 0.059113                   | TRAV4             | TRAJ25            | CLVGDGFSFIF             |
| Severe_4        | 0.051724                   | TRAV24            | TRAJ49            | CARNTGNQFYF             |
| Severe_5        | 0.049261                   | TRAV4             | TRAJ6             | CLGSGGSYIPTF            |
| Severe_6        | 0.041872                   | TRAV9-2           | TRAJ20            | CALKANDYKLSF            |
