# Supplementary material for: Combination of spatial transcriptomics analysis and retrospective study reveals liver infection of SARS-COV-2 is associated with clinical outcomes of COVID-19
Source: PubMed Central journal article supplement — eBioMedicine. 2024 Dec 21;111:105517. doi: 10.1016/j.ebiom.2024.105517 (PMC11732063; doi:10.1016/j.ebiom.2024.105517), 2024-12-21
Supplement: mmc5.pdf [file mmc5.pdf]

**Supplementary Table S4: Top TCR CDR3 $\beta$  clones in patients' livers**

| <b>Clone.ID</b> | <b>Clone.Fraction</b> | <b>V. Segment</b> | <b>D. Segment</b> | <b>J.Segment</b> | <b>CDR3.AA.Sequence</b> |
|-----------------|-----------------------|-------------------|-------------------|------------------|-------------------------|
| Deceased_1      | 0.100038              | TRBV20-1          | TRBD2             | TRBJ2-7          | CSALASGSVPYEQYF         |
| Deceased_2      | 0.045478              | TRBV28            | TRBD1             | TRBJ2-5          | CASSIGTVSGTQYF          |
| Deceased_3      | 0.033457              | TRBV9             | .                 | TRBJ2-3          | CASSADGAGTDTQYF         |
| Deceased_4      | 0.013427              | TRBV5-5           | TRBD2             | TRBJ2-7          | CASSEAGSYEQYF           |
| Deceased_5      | 0.010919              | TRBV6-5           | TRBD2             | TRBJ2-7          | CASSYLGTSDLGEQY<br>F    |
| Deceased_6      | 0.009597              | TRBV28            | TRBD1             | TRBJ2-7          | CASTATGGYSYEQYF         |
| Severe_1        | 0.069223              | TRBV10-1          | TRBD2             | TRBJ2-1          | CASSEAGSDYNEQFF         |
| Severe_2        | 0.019607              | TRBV20-1          | .                 | TRBJ2-7          | CSGSPSSYEQYF            |
| Severe_3        | 0.016475              | TRBV15            | TRBD1             | TRBJ2-2          | CATSRGQGSRELFF          |
| Severe_4        | 0.014178              | TRBV20-1          | TRBD2             | TRBJ2-5          | CSASTSRQETQYF           |
| Severe_5        | 0.011509              | TRBV2             | TRBD1             | TRBJ2-5          | CASSEGPGWETQYF          |
| Severe_6        | 0.009250              | TRBV27            | TRBD1             | TRBJ2-7          | CASSRRTGSYEQYF          |
